# Supplementary material for: Adjustments to the Rock-Eval® thermal analysis for soil organic and inorganic carbon quantification
Source: Copernicus journal article supplement (doi:10.5194/bg-20-5229-2023), 2023-12-22

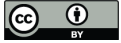

*Supplement of*

## **Adjustments to the Rock-Eval<sup>®</sup> thermal analysis for soil organic and inorganic carbon quantification**

**Joséphine Hazera et al.**

*Correspondence to:* Joséphine Hazera ([josephine.hazera@ifpen.fr](mailto:josephine.hazera@ifpen.fr)) and Tiphaine Chevallier ([tiphaine.chevallier@ird.fr](mailto:tiphaine.chevallier@ird.fr))

The copyright of individual parts of the supplement might differ from the article licence.

## Supplementary Materials

Figure S1: Example of the 5 thermograms and 9 curves (S1, S2, S3CO, S3'CO, S3CO<sub>2</sub>, S3'CO<sub>2</sub>, S4CO, S4CO<sub>2</sub> and S5) obtained during the Rock-Eval® analysis of a non-calcareous agricultural topsoil with a SOC content of 14.27 g SOC kg<sup>-1</sup>. For non-calcareous soils, all the curves correspond to the pyrolytic cracking or the oxidative combustion of SOC and are thus integrated in the TOC parameter calculation.

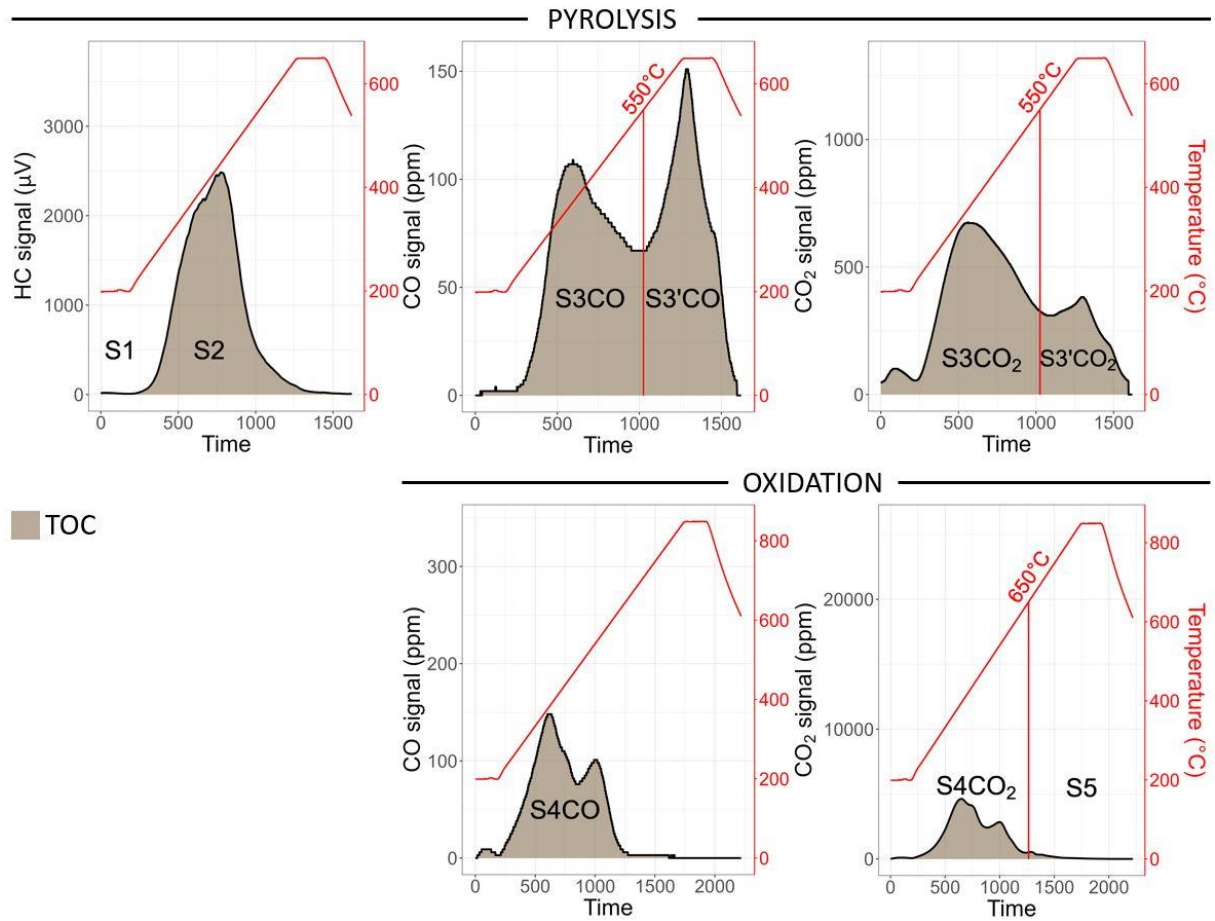

**Figure S2: X-ray diffractogram of the calcite sample used in this study. ICDD: International Centre for Diffraction Data**

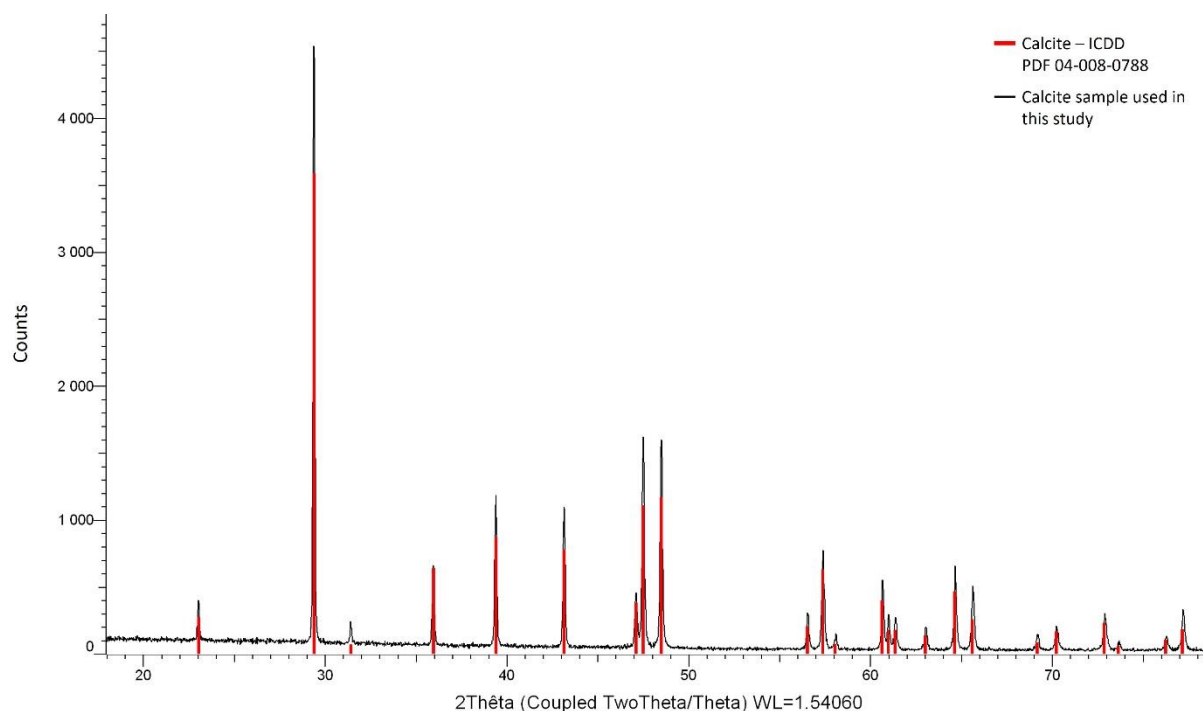

**Table S1: Organic C, inorganic C, and total C contents (g OC kg<sup>-1</sup>, g IC kg<sup>-1</sup> and, g TC kg<sup>-1</sup>) of the three standards materials (*ISE850*, *CC690*, and *SRI*) and total C content (g TC kg<sup>-1</sup>) of the calcite sample assessed by EA and RE on four aliquots (mean  $\pm$  standard deviation) compared to their reference values for total C content (g TC kg<sup>-1</sup>). The RE values are corrected excepted for the *SRI* and the calcite sample.**

|         | Measured values   |            |                     |            |            |            | Reference values |
|---------|-------------------|------------|---------------------|------------|------------|------------|------------------|
|         | Organic C         |            | Inorganic C         |            | Total C    |            | Total C          |
|         | EA <sub>HCl</sub> | RE         | EA <sub>550°C</sub> | RE         | EA         | RE         |                  |
| ISE850  | 4.26              | 1.87       | 67.07               | 68.96      | 71.37      | 70.83      | 68.3 $\pm$ 1.9   |
| 0       | $\pm$ 0.08        | $\pm$ 0.11 | $\pm$ 1.56          | $\pm$ 0.74 | $\pm$ 1.51 | $\pm$ 0.84 |                  |
| CC690   | 69.48             | 76.95      | 27.39               | 22.91      | 98.04      | 99.86      | 97 $\pm$ 4       |
| 0       | $\pm$ 3.49        | $\pm$ 2.42 | $\pm$ 0.43          | $\pm$ 0.56 | $\pm$ 2.39 | $\pm$ 1.92 |                  |
| SR1     | 22.14             | 22.70      | 11.22               | 14.45      | 37.47      | 37.15      | 36.9 $\pm$ ND    |
| 0       | $\pm$ 0.05        | $\pm$ 0.03 | $\pm$ 2.67          | $\pm$ 0.12 | $\pm$ 0.42 | $\pm$ 0.13 |                  |
| Calcite | NA                | NA         | NA                  | NA         | 119.87     | 120.20     | 120.0 $\pm$ NA   |
| 0       |                   |            |                     |            | $\pm$ 0.29 | $\pm$ 0.32 |                  |

**Figure S3: The 5 thermograms and 9 curves (S1, S2, S3CO, S3'CO, S3CO<sub>2</sub>, S3'CO<sub>2</sub>, S4CO, S4CO<sub>2</sub> and S5) obtained during the Rock-Eval® analysis of the calcite sample used in this study. For calcite, all the curves correspond to the thermal breakdown of CaCO<sub>3</sub> and are thus integrated in the MinC parameter calculation.**

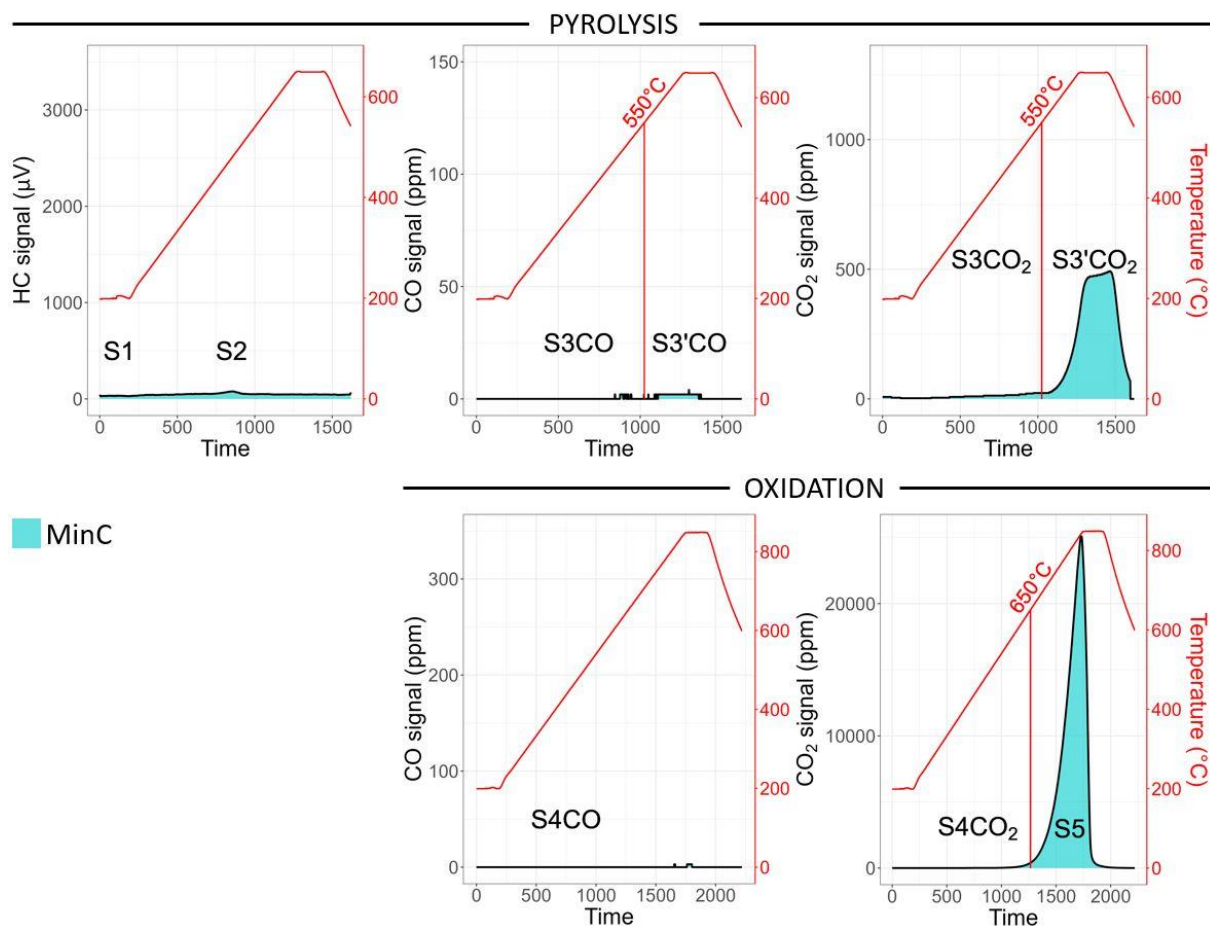

Supplement: Supplementary file 1 [file bg-20-5229-2023-supplement.pdf]
